# Supplementary material
Source: PubMed Central journal article supplement (PMC11108471)
Supplement: 18_2016_2159_MOESM2_ESM.pdf [file 18_2016_2159_MOESM2_ESM.pdf]

Affymetrix ID t3385042

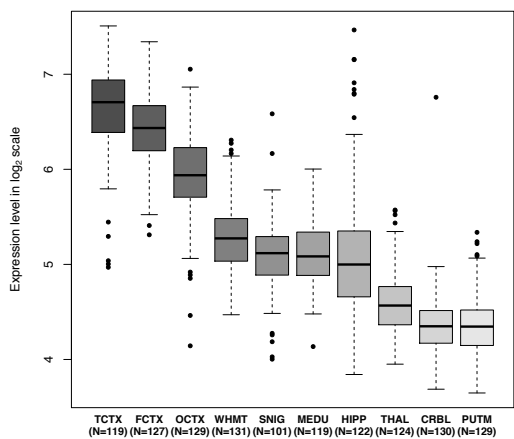

Fold change between TCTX and PUTM = 4.9 (p=2.4e-75)

Source: BRAINEAC

Affymetrix ID t3918959

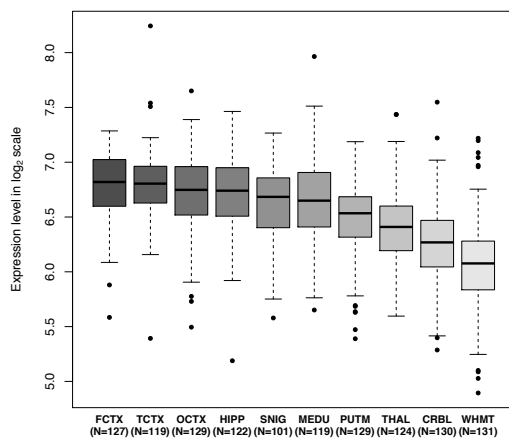

Fold change between FCTX and WHMT = 1.7 (p=6.1e-35)

Source: BRAINEAC

Affymetrix ID t3981027

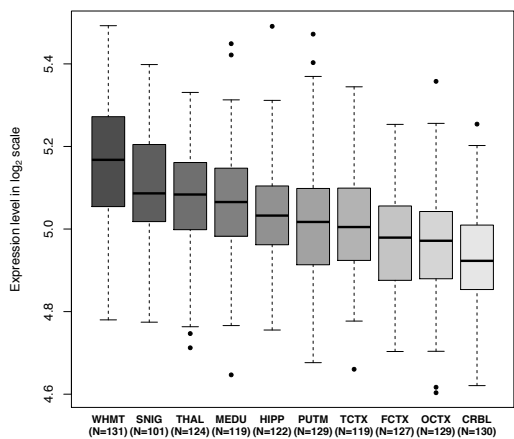

Fold change between WHMT and CRBL = 1.2 (p=4e-28)

Source: BRAINEAC

Affymetrix ID t3980170

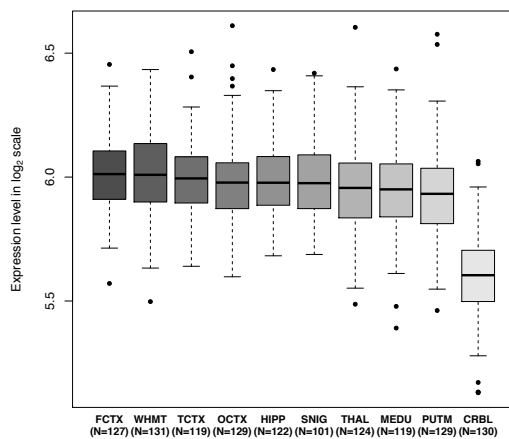

Fold change between FCTX and CRBL = 1.3 (p=8.6e-43)

Source: BRAINEAC

Affymetrix ID t3031181

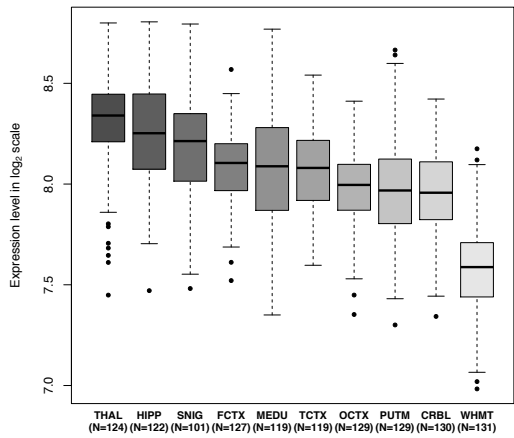

Fold change between THAL and WHMT = 1.6 (p=4.9e-53)

Source: BRAINEAC

Affymetrix ID t3918959

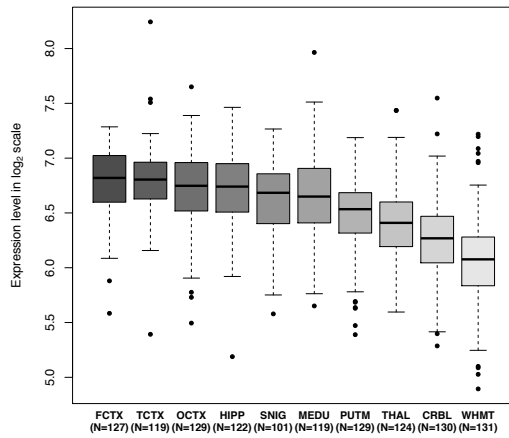

Fold change between FCTX and WHMT = 1.7 (p=6.1e-35)

Source: BRAINEAC

Affymetrix ID t3021009

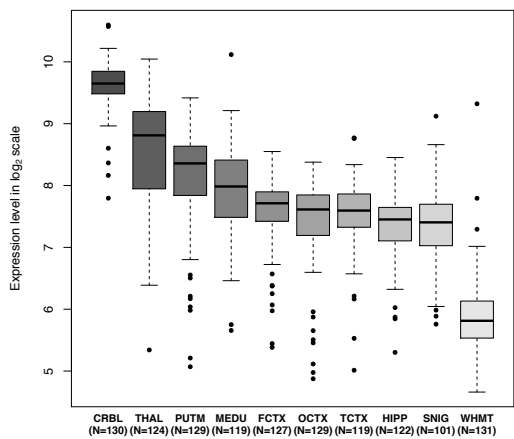

Fold change between CRBL and WHMT = 13.3 (p=1.2e-97)

Source: BRAINEAC

Affymetrix ID t2608725

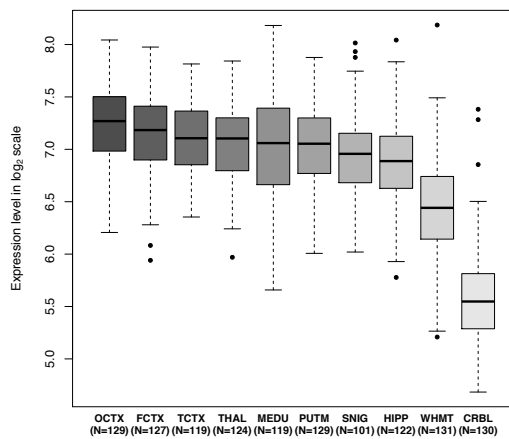

Fold change between OCTX and CRBL = 3.2 (p=2.2e-62)

Source: BRAINEAC
