# Supplementary material
Source: PubMed Central journal article supplement (PMC11108471)

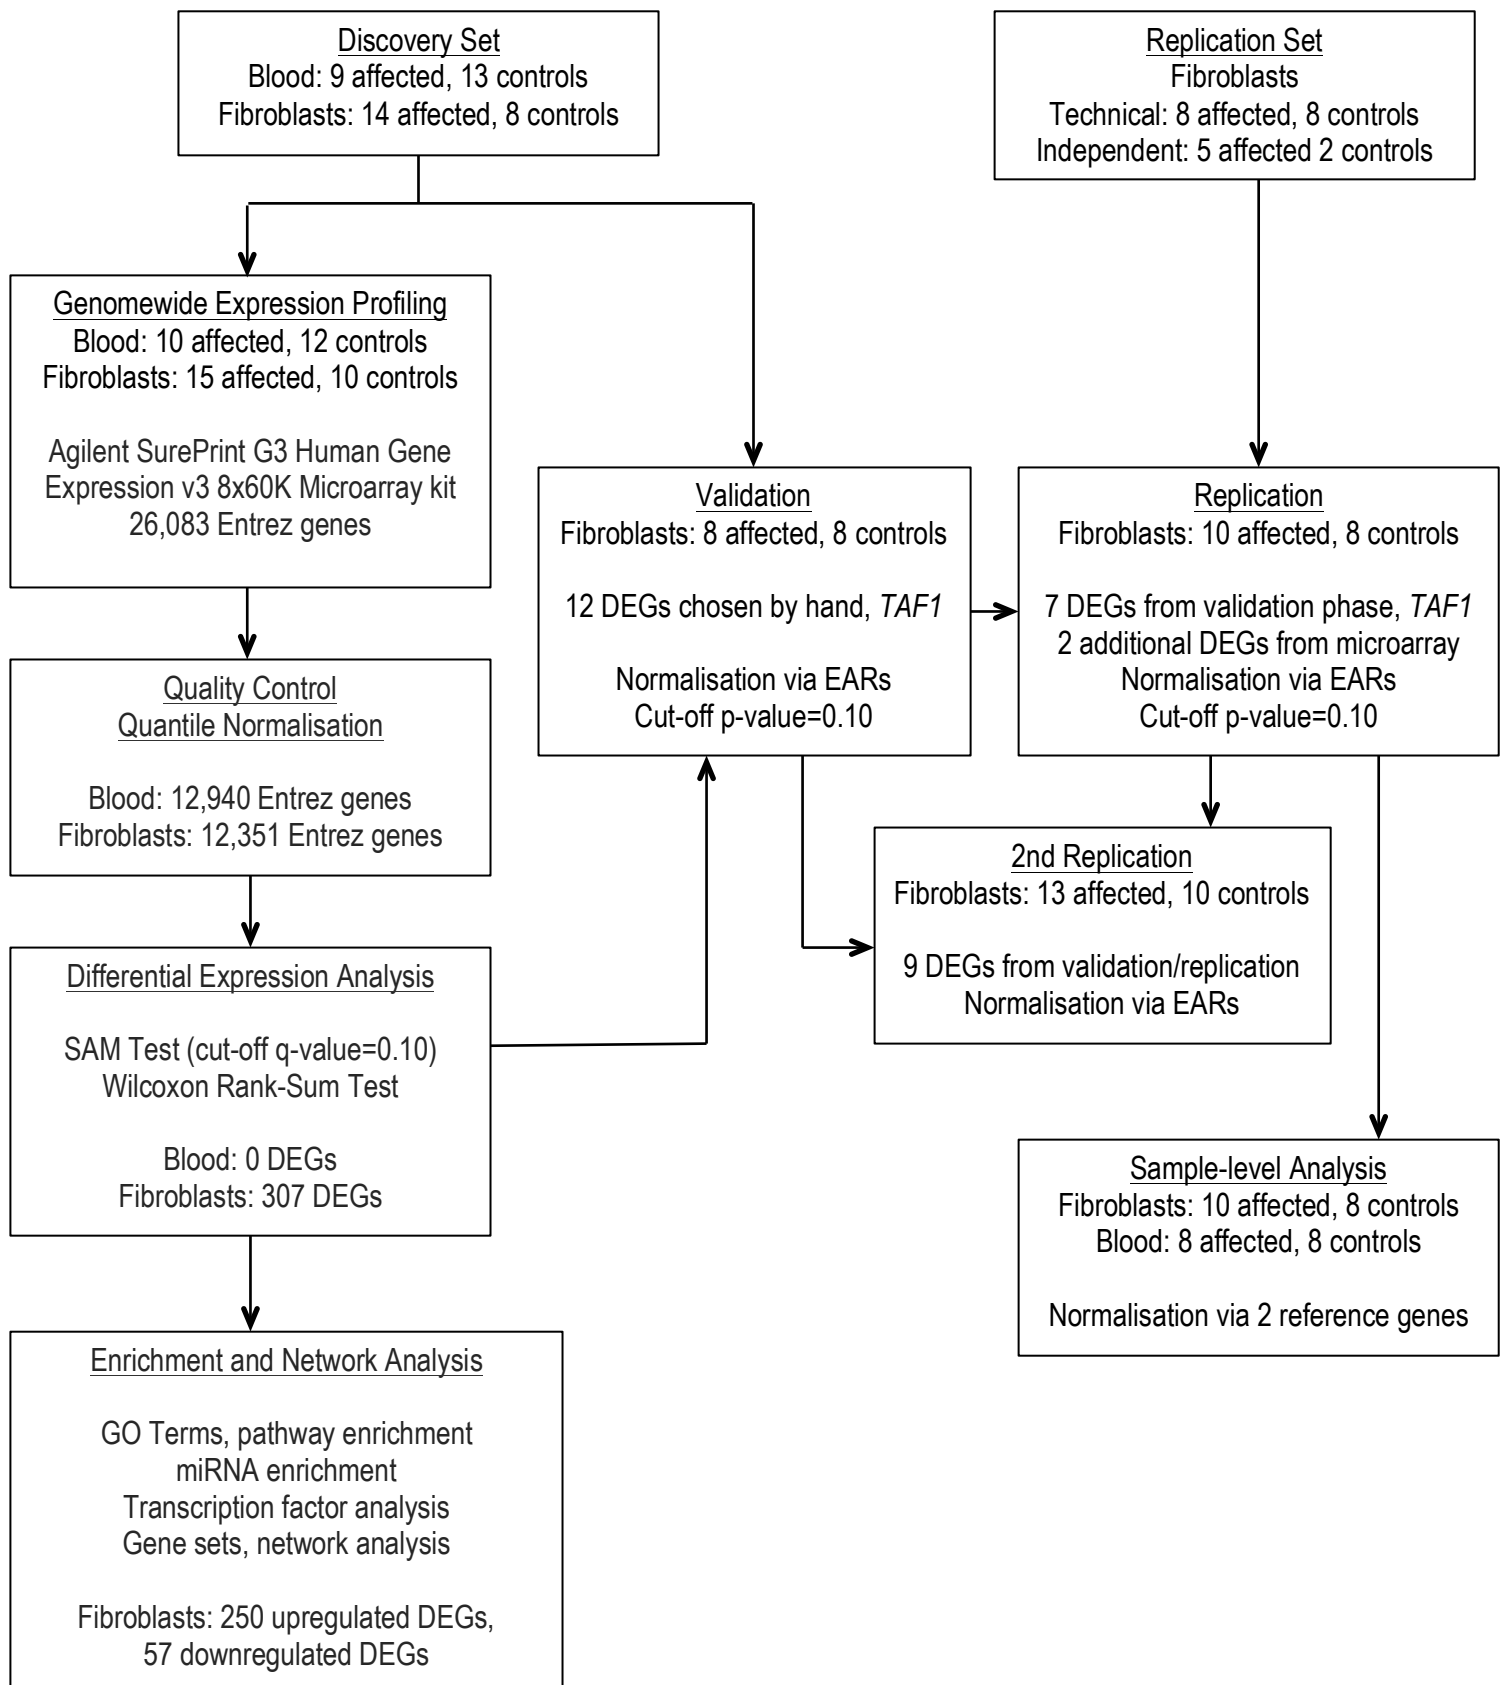

Supplement: 18_2016_2159_MOESM1_ESM.pdf [file 18_2016_2159_MOESM1_ESM.pdf]
